# Supplementary material
Source: publisher figshare collection journal article supplement (https://gsajournals.figshare.com/ndownloader/files/12298934)
Supplement: Supplementary file 1 [file 12298934]

## Sheet: Sheet1
Table S7: Differentially expressed genes in the sheep abomasum using pairwise comparisons between birth and one week and one week and 8 weeks of age.
A: DE genes between birth and one week of age							B: DE genes between one week and 8 weeks of age
GENE_NAME	LOG_FC	P	FDR	AVG_COUNT_NEWBORN	AVG_COUNT_1WEEK		GENE_NAME	LOG_FC	P	FDR	AVG_COUNT_1WEEK	AVG_COUNT_8WEEK
IGHM	5.10822	1.14e-67	3.09e-63	23.3333	865.5		ENSOARG00000001084	12.2759	2.69e-57	7.29e-53	363.144	510.266
ENSOARG00000002715	3.37344	2.26e-41	3.06e-37	280	3096.5		CLCA1	-3.30527	2.16e-42	1.68e-38	3652	854
ENSOARG00000002904	3.32232	4.35e-33	3.92e-29	405.998	4393.61		DIO1	-4.41661	2.48e-42	1.68e-38	240.667	19
ENSOARG00000003969	3.23157	5.77e-29	3.9e-25	12734.3	129190		MOXD1	-4.08476	1.4e-40	7.56e-37	367.333	47
ENSOARG00000002716	3.20074	7.43e-29	4.02e-25	103.335	1019.89		ENSOARG00000004667	-4.15826	1.03e-39	4.64e-36	789.771	68.1667
TFF2	4.24382	7.06e-26	3.18e-22	4236.33	85823		ISG15	3.07782	1.17e-36	4.53e-33	523.667	602
CGREF1	3.04208	6.45e-24	2.49e-20	62.3333	550		ENSOARG00000018343	-4.04451	1.2e-35	4.07e-32	375.903	38
PLA2G10	3.23142	9e-21	2.71e-17	55.6667	552.5		IFIT3	3.13832	7.74e-31	2.33e-27	336.922	438.882
ENSOARG00000018341	3.07303	5.88e-19	1.59e-15	48.3333	443.647		ENSOARG00000018341	-3.80009	4.9e-30	1.33e-26	154.764	17.5
CYP3A24	-2.5166	1.26e-17	2.85e-14	304.908	56.9404		ENSOARG00000014490	3.08252	1.68e-28	3.83e-25	2639.46	3178.01
SCTR	3.07742	6.22e-17	1.2e-13	54.3333	499		ENSOARG00000009097	2.49574	1.7e-28	3.83e-25	1036.21	1262.41
GKN2	2.4421	6.91e-17	1.25e-13	12915	75747		CARD14	2.32959	1.04e-26	2.17e-23	719.667	829
PGC	2.09561	1.32e-16	2.1e-13	12279.3	56635.5		SERPINF2	-2.01008	8.5e-25	1.64e-21	765	288
ENTPD8	-2.04657	3.55e-14	5.06e-11	422.333	111.5		ENTPD8	2.35116	3.22e-22	5.8e-19	374.333	454
ENSOARG00000018781	-2.16444	6e-14	8.11e-11	570.26	139.024		ENSOARG00000011663	3.09548	1.36e-21	2.17e-18	412.806	516.577
JCHAIN	2.9183	6.49e-14	8.36e-11	31.3333	252.5		RASIP1	-2.29029	1.33e-21	2.17e-18	2911.33	1123
PROC	3.46401	1.79e-13	2.2e-10	11.6667	140		ENSOARG00000009143	6.25698	2.63e-21	3.96e-18	149.06	219.453
PLA2G1B	2.52547	9.27e-13	1.09e-09	43	269		CDHR2	2.18404	2.8e-21	3.99e-18	2018	2435
ENSOARG00000015646	2.06867	1.22e-12	1.37e-09	144.928	642.711		MX1	2.12697	5.53e-21	7.49e-18	1047.67	1306.5
ENSOARG00000012043	2.46335	1.75e-12	1.9e-09	71143	418026		IFI6	2.41684	2.03e-19	2.62e-16	462	596.5
ENSOARG00000006366	2.94064	2.47e-12	2.39e-09	1156.33	9619		IZUMO1	-2.16216	4.47e-18	5.5e-15	2318.33	975
PEBP4	2.31389	7.07e-12	6.6e-09	45	245.5		GKN1	2.49552	5.68e-17	6.4e-14	469138	468889
DYNC1I1	2.8727	7.52e-12	6.79e-09	15.6667	123.5		ENSOARG00000019460	-3.53455	5.93e-17	6.42e-14	1.07584e+06	252840
WSCD2	-2.82471	1.57e-11	1.25e-08	193	29.5		ENSOARG00000009708	6.3798	8.95e-17	9.31e-14	929.972	706.457
HIF3A	-4.41187	1.72e-11	1.33e-08	5071	265		B3GNT7	2.22448	1.3e-16	1.3e-13	333	432
ENSOARG00000009097	2.20288	2.86e-10	1.89e-07	53	260.352		IL1R2	2.31112	1.9e-16	1.83e-13	395.333	469
SESN2	-2.52418	4.68e-10	2.94e-07	175	32.5		ENSOARG00000014375	2.24083	2.41e-16	2.25e-13	1859.37	2182.06
CCL11	-2.22636	7.48e-10	4.5e-07	160.333	37.5		ENSOARG00000017380	2.2242	2.54e-16	2.29e-13	278.938	300.478
PTPRC	2.00756	9.62e-10	5.54e-07	102.334	439		ENSOARG00000012457	3.70296	3.07e-16	2.68e-13	454.175	682.552
ISG15	2.6267	1.36e-09	7.66e-07	14.6667	98.5		ENSOARG00000000857	4.30171	3.33e-16	2.82e-13	113.692	180.973
ENSOARG00000020393	2.02885	4.35e-09	2.18e-06	313798	1.2336e+06		ENSOARG00000016896	4.649	8.69e-16	7.12e-13	56.6667	71.5
ENSOARG00000014413	3.55339	6.49e-09	3.08e-06	13.3333	164.5		ENSOARG00000016213	3.96837	1.07e-15	8.48e-13	504	683.5
TNNI2	-2.65733	8.26e-09	3.79e-06	228.333	39.5		B3GAT2	2.95547	1.72e-15	1.33e-12	168.333	161
MYO1G	2.35734	8.87e-09	4e-06	23.3333	128.5		ENSOARG00000014413	3.3725	4.84e-15	3.64e-12	1050.33	1443
ENSOARG00000018343	2.77581	1.08e-08	4.71e-06	120.667	918.855		ENSOARG00000008189	2.84234	1.19e-14	8.7e-12	770.333	680
ENSOARG00000014902	-4.03366	1.73e-08	7.31e-06	969.801	65.111		TTC22	2.22723	3.25e-14	2.2e-11	393	395
CD2	2.07454	1.93e-08	7.74e-06	52.1285	232.238		RSAD2	3.36731	4.79e-14	3.16e-11	124	194.5
KHK	2.36966	2.36e-08	9.1e-06	92	509		TMC5	2.79447	6.53e-14	4.21e-11	311.333	385.5
IL2RB	2.49936	2.84e-08	1.08e-05	20	119.5		CD244	2.92774	8.5e-14	5.35e-11	85	102.5
ENSOARG00000020515	2.18871	4.34e-08	1.57e-05	16.1446	78.8331		ENSOARG00000000005	-2.42668	1.04e-13	6.37e-11	230	66
SLC23A1	2.40237	2.59e-07	7.38e-05	16	91		ATP10B	2.16416	2.08e-13	1.25e-10	216.667	265.5
ENSOARG00000002875	2.19771	3.49e-07	9.55e-05	145.6	734.497		PIGR	3.54019	3.42e-13	1.93e-10	13591	11630.5
ZBP1	2.61511	4.67e-07	0.000122655	16	106.5		H19_1	-2.93323	4.65e-13	2.57e-10	39.6667	12
TRAC	3.38423	7.03e-07	0.000171414	30.8046	197.23		ENSOARG00000001083	2.29889	1.25e-12	6.64e-10	2530	2119.5
MX2	2.05587	7.03e-07	0.000171414	19	85.5		ENSOARG00000003969	-2.72845	3.16e-12	1.61e-09	52173.7	17570
MMP9	2.09605	7.61e-07	0.000183055	22.5637	106.254		HERC6	3.01099	1.08e-11	5.32e-09	356.667	635.5
GRHL3	-2.15294	1.05e-06	0.000236754	61.3333	14.5		CYP3A24	3.16139	1.69e-11	8.16e-09	394.591	469.983
KEL	-3.70238	1.72e-06	0.000358422	219	18		ENSOARG00000026482	2.98626	2.7e-11	1.27e-08	714.705	1116.62
ENSOARG00000001465	2.67244	2.43e-06	0.000467032	20.2999	135.861		ENSOARG00000000015	-3.53338	2.73e-11	1.27e-08	36.3333	11
SYT8	-2.24107	3.43e-06	0.000613666	412.333	94		TACSTD2	2.2825	5.2e-11	2.27e-08	502.716	434.683
ENSOARG00000005549	7.2499	4.64e-06	0.000792928	26.2119	4116.23		TFF2	-2.384	5.48e-11	2.35e-08	35966.3	13829
POU2AF1	2.39916	4.79e-06	0.000810485	15	87.5		CCL11	2.27135	9.15e-11	3.87e-08	103	127
ENSOARG00000012585	4.0696	6.88e-06	0.0011077	38.6667	681.938		ENSOARG00000012585	2.24883	1.14e-10	4.68e-08	2103.61	3067.98
CHRDL2	-2.90995	1.12e-05	0.00169452	134	19.5		ENSOARG00000002786	2.14524	1.52e-10	5.97e-08	8685.33	7331.5
FKBP5	-2.4721	1.35e-05	0.0019698	2815	567		IFI44	2.01682	2.35e-10	8.94e-08	298.892	466.19
CD4	2.17508	1.63e-05	0.00230931	44.1933	201.371		ENSOARG00000019837	-2.05774	2.86e-10	1.06e-07	206.003	61.7961
SLAMF7	2.06981	1.7e-05	0.00238594	19.3333	86		ENSOARG00000026068	-2.58116	3.58e-10	1.29e-07	48.0242	19.893
ENSOARG00000006374	2.46812	1.79e-05	0.00244995	19.6667	113.941		ENSOARG00000002231	2.35617	4.06e-10	1.45e-07	190.333	254.5
FSTL3	-2.2679	1.83e-05	0.00246553	155.667	36		PKLR	2.81533	4.26e-10	1.5e-07	171.667	306
STC2	-2.77714	2.63e-05	0.00327983	118.333	18.5		HCN3	2.68986	5.1e-10	1.77e-07	60	73.7039
EDN3	-2.01993	2.7e-05	0.00334138	53.3333	14		KRT35	2.02751	6.64e-10	2.25e-07	94.6373	106.492
ENSOARG00000012387	2.03211	2.83e-05	0.00341311	12	53		ENSOARG00000002492	2.0115	7.68e-10	2.53e-07	2916	2730.5
ENSOARG00000007595	-2.22581	3.44e-05	0.00404342	169	38.5		FOS	2.74192	1.19e-09	3.79e-07	2397	1790
ENSOARG00000017922	2.09728	3.83e-05	0.00441074	20.6667	94.5		ENSOARG00000002631	2.38246	1.32e-09	4.09e-07	75.2762	105.817
ENSOARG00000002283	-2.09599	4.1e-05	0.00462681	1170.58	300.658		ENSOARG00000003815	3.3938	1.36e-09	4.13e-07	39.3333	64.5
PTGDR2	-2.12484	5.14e-05	0.00550162	120.667	31.5		JCHAIN	2.4504	1.91e-09	5.67e-07	853	1356
AZGP1	2.51239	6.46e-05	0.00661905	19.6667	121.5		ENSOARG00000012537	2.18031	1.95e-09	5.75e-07	96.8631	138.114
ENSOARG00000019855	2.30554	7.02e-05	0.00711109	60	329		ENSOARG00000014451	2.11452	2.33e-09	6.71e-07	13861	14511.5
NEURL3	2.4709	7.95e-05	0.00782149	10.3333	61.5		GBA3	2.85416	3.14e-09	8.95e-07	295.333	381
ENSOARG00000015707	2.06899	8.88e-05	0.00854965	80.1881	307.26		GKN2	2.1246	3.37e-09	9.29e-07	246185	222980
SCNN1G	-4.04728	9.55e-05	0.00893856	212.333	14		CYP2B6	2.39886	4.54e-09	1.19e-06	162.098	152.35
NHS	2.13759	0.000104772	0.00957602	36	168		ENSOARG00000021196	2.31921	5.16e-09	1.32e-06	89.3332	80.5
LCK	2.39239	0.000117265	0.0104359	15	81.5		DGAT2L6	4.07529	7.54e-09	1.82e-06	26	24.5
SPP1	2.62395	0.000123281	0.0107243	84.6667	594.5		SCRG1	3.3152	8.37e-09	2e-06	104.667	115
LINC01314	2.01473	0.000150666	0.0125847	29.6667	132		IFIT1	2.50578	9.51e-09	2.26e-06	288	444.5
ENSOARG00000002143	2.16904	0.000176087	0.0141781	32.0962	150.134		FBN3	-2.03944	1.16e-08	2.71e-06	92	36.5
AQP5	2.99721	0.000422548	0.0270022	61.3333	537		PKHD1	-2.3337	2.48e-08	5.54e-06	73	22.5
SPRR3	-5.54342	0.000505376	0.0308633	613	14.5		ENSOARG00000000083	5.34161	2.97e-08	6.47e-06	14.4075	27.5101
FGG	2.05832	0.000590278	0.0345658	177.921	780.188		ENSOARG00000020159	-2.22672	3.83e-08	8.15e-06	269.99	96.85
CD3E	2.37315	0.000655313	0.0374817	11.6667	65.5		RPRM	4.34629	4.79e-08	9.82e-06	36.6667	33.5
PSAT1	-2.37947	0.000815799	0.044768	1900.67	388		CAPN13	3.207	8.02e-08	1.52e-05	1092.33	1163.5
							SFN	2.3891	1.06e-07	1.94e-05	343.667	495
							PCOLCE2	2.86814	1.12e-07	2.03e-05	847.333	764.5
							CYP1A1	3.92883	1.37e-07	2.4e-05	31.3075	30
							ENSOARG00000017600	2.07741	1.48e-07	2.48e-05	56.3333	55
							MZB1	2.85758	1.55e-07	2.58e-05	25.6667	39.5
							ENSOARG00000000014	-2.11289	1.94e-07	3.14e-05	98	37
							C4BPA	2.06372	2.03e-07	3.25e-05	116.729	110.01
							ENSOARG00000014805	7.36523	2.72e-07	4.28e-05	28	95
							ENSOARG00000002109	2.44469	2.81e-07	4.4e-05	540.788	860.095
							SFRP4	2.31263	3.58e-07	5.48e-05	134.667	137.5
							HAMP	2.02302	3.85e-07	5.86e-05	49.3333	48.5
							ENSOARG00000026142	-2.60621	4.59e-07	6.87e-05	217.302	50.9259
							ENSOARG00000015002	2.22672	5.64e-07	8.25e-05	7489.86	7992.88
							CLDN23	4.72269	7.24e-07	0.000103127	22.3333	17
							MSX2	3.69774	9.09e-07	0.000125526	128.667	87
							RNF125	2.17009	9.45e-07	0.000129077	52.3333	63.5
							IL1A	2.03923	9.63e-07	0.000130891	98.3333	153.5
							S100A3	2.71489	1.03e-06	0.000138673	17.6667	18.5
							CCK	9.39781	1.12e-06	0.000147895	85.6667	18
							KRT20	3.68304	1.33e-06	0.000169691	2685.33	2871
							IGFBP6	2.02453	1.72e-06	0.000214991	773.333	706.5
							ENSOARG00000004325	3.03982	1.77e-06	0.000221159	16.6667	25.5
							EFEMP1	2.20718	2.19e-06	0.000266504	2621	3039
							HHLA2	2.89221	2.27e-06	0.000274456	57	73
							ENSOARG00000014486	2.34838	2.66e-06	0.000313703	155.249	296.966
							ENSOARG00000002151	2.14089	2.91e-06	0.000339063	34.3333	47
							ENSOARG00000002716	-2.52425	3.17e-06	0.000360194	415.389	149.077
							MEDAG	3.02933	3.7e-06	0.000408532	342.667	401.5
							ENSOARG00000001799	3.92845	3.91e-06	0.000426133	258	296.5
							MX2	2.14005	3.96e-06	0.000430166	226.667	390.5
							DAB1	2.04945	3.98e-06	0.000431001	48.3333	45
							ENSOARG00000011061	2.26284	5.52e-06	0.000572643	32.9583	25.2183
							ABCA7	-2.17828	5.63e-06	0.000577196	388.333	208
							RNF182	-2.03345	6.11e-06	0.000619201	29.6667	16.5
							KLB	-2.23494	7.03e-06	0.000691163	59.3333	30
							ENSOARG00000000597	3.35487	7.07e-06	0.000693425	33.9612	27.8498
							ABCG8	-2.29105	9.14e-06	0.000858555	56.6667	16.5
							ENSOARG00000001254	2.7066	9.91e-06	0.000921094	6695.67	6365
							ENSOARG00000008862	2.48323	1.13e-05	0.00103163	1204.8	1867.48
							RHBDL2	2.49471	1.15e-05	0.00104166	499	380
							ENSOARG00000018037	2.60016	1.23e-05	0.00109861	14.6667	20.5
							RGS11	-2.54883	1.27e-05	0.0011259	86	49
							ACKR4	2.71099	1.33e-05	0.0011757	75.3333	103
							ENSOARG00000000300	2.70365	1.34e-05	0.00117713	90.3333	109.5
							ENSOARG00000020964	8.03451	1.42e-05	0.00123902	26.5541	43.5091
							VIPR1	2.51187	1.47e-05	0.00127241	16.6667	25
							ENSOARG00000025871	-2.71855	1.54e-05	0.00133057	32	14
							ENSOARG00000002904	-2.46244	1.61e-05	0.00138174	1772.94	701.924
							ENSOARG00000002715	-2.53209	2.1e-05	0.00171904	1256	484
							ENSOARG00000011815	3.14073	2.16e-05	0.0017517	135.333	115.5
							ENSOARG00000009357	2.31201	2.24e-05	0.00180842	400.341	730.014
							CELA1	2.39341	2.26e-05	0.00182333	11780.7	9422.5
							ENSOARG00000026630	2.00419	2.6e-05	0.00204737	66.2524	63.0823
							DLK1	-2.00181	3.12e-05	0.00238312	133.333	45
							GFPT2	2.5522	3.15e-05	0.00238916	527.333	578
							ISG20	2.1241	3.21e-05	0.00241468	28	30
							CCL24	2.42775	3.96e-05	0.00292166	28.3333	26.5
							FFAR4	2.2233	4.12e-05	0.00298719	120.667	125
							ENSOARG00000005037	2.38829	4.21e-05	0.00304082	672.488	819.233
							ENSOARG00000000034	-2.56993	4.6e-05	0.00328304	309.333	174.5
							TMEM190	-2.09822	5.12e-05	0.00360871	19.3333	10.5
							ITLN2	5.31774	5.62e-05	0.00389747	158.943	41.9706
							ENSOARG00000017928	2.72943	5.86e-05	0.00401651	25.3333	29
							MMP12	4.26576	6.75e-05	0.00454538	26.6667	17
							ENSOARG00000027053	3.52666	7.11e-05	0.00476023	20.9631	26.3601
							ENSOARG00000002747	2.17789	7.27e-05	0.0048227	28.6415	36.9357
							ENSOARG00000017970	2.25926	7.54e-05	0.00496493	18	22.5
							IL7	2.78074	8.17e-05	0.00524893	18	20
							KCNK15	2.60683	8.71e-05	0.00553402	158.613	134.5
							CD248	2.02937	9.27e-05	0.00581981	792.333	771.5
							ABCA10	2.12377	0.000104556	0.00642877	73.6667	65
							CCL16	3.94185	0.000112098	0.00681506	262	63
							ENSOARG00000000370	3.5704	0.000119013	0.00715509	15.6667	14.5
							SULF1	2.41393	0.000122851	0.00730464	201.667	235
							FRAS1	-2.08589	0.000147513	0.0083142	47.3333	16.5
							ELF5	-2.03497	0.000162931	0.00899736	40.3333	24.5
							ENSOARG00000009724	2.50513	0.000168175	0.00915453	103.007	246.831
							ENSOARG00000016939	2.73248	0.000183082	0.0098815	104.052	176.3
							AREG	2.22784	0.000187584	0.0100892	178.333	192.5
							NOV	3.44412	0.000193341	0.0102562	1054.33	1445
							LHCGR	7.29778	0.000195301	0.0102795	19.6667	13.5
							ENSOARG00000024080	5.80638	0.000197794	0.0103905	26.6667	141.5
							COL26A1	2.15053	0.000215828	0.0110797	40	39
							CILP	2.78917	0.000223616	0.0113931	463.667	509.5
							MYH15	2.90716	0.000249975	0.0124317	20.6667	24.5
							SERPINF1	2.14725	0.000254713	0.0125978	532.333	521
							TFPI2	2.01146	0.000332956	0.0155039	1217.33	996.5
							APOBEC1	2.18248	0.000343507	0.0158859	110.333	134
							ENSOARG00000019088	4.91214	0.000354332	0.0162752	96.3333	133
							MCTP2	2.69081	0.000403363	0.0178895	115.333	94.5
							ASPN	2.80301	0.000409286	0.0180474	427.333	485.5
							GPR1	3.05224	0.000419204	0.0182627	118.333	134.5
							ENSOARG00000013681	3.32414	0.000447782	0.0191379	10.3445	19.5765
							MSMB	5.08404	0.000590748	0.0242153	6546.67	4488
							ENSOARG00000014495	2.28408	0.000646247	0.0258251	56.3333	64
							ENSOARG00000000308	2.52817	0.00066098	0.0262202	67	77.5
							CR2	2.35843	0.000731109	0.0283779	137.667	171
							SCN5A	-2.15685	0.000732227	0.0283806	470.633	207.454
							GALNT15	2.49033	0.000777341	0.0297037	16	11.5
							FOSB	2.85529	0.000875661	0.0325414	57.6667	66
							ENSOARG00000012578	2.08371	0.000890772	0.0329671	18.8472	15.8709
							SYT8	2.40712	0.00091891	0.0336735	262	320
							PPP2R2B	2.48214	0.0009372	0.0340443	33	42
							SERPINA5	-2.07316	0.000942258	0.0340632	40	18
							PI16	3.15546	0.0011784	0.0399005	2503	3130.5
							ENSOARG00000014422	2.11643	0.0012719	0.0421691	10.3333	14.5
							ENSOARG00000009916	-2.3331	0.00131788	0.0431646	54.6667	15.5
							ENSOARG00000010991	2.11223	0.00134774	0.043877	16	17
							CLDN2	2.38265	0.00140042	0.0452898	33.6667	19
							ENSOARG00000001808	2.10739	0.00154942	0.0491418	11.2019	14.8178
